# Supplementary material for: Mesoporous silica polymer nanocomposites encapsulated with polyphosphoric acid for the synthesis of β-amino carbonyl compounds under environmental benign conditions
Source: Royal Society of Chemistry journal article supplement (doi:10.1039/c4nj01748j), 2015-01-01
Supplement: c4nj01748j1.pdf [file c4nj01748j1.pdf]

## Supplementary Data

### Mesoporous silica polymer nanocomposites encapsulated with polyphosphoric acid for synthesis of $\beta$ -amino carbonyl compounds under environmental benign conditions

Divya Sachdev<sup>1\*</sup>, Amit Dubey<sup>2</sup>, G. Robin Wilson<sup>2</sup> and Ankita Sharma<sup>2</sup>

<sup>1\*</sup> National Institute of Food Technology Entrepreneurship and Management-Kundli

<sup>2</sup> Maulana Azad National Institute of Technology (MANIT) - Bhopal (M.P.)-462051

\*Author of correspondence: Dr. Divya Sachdev

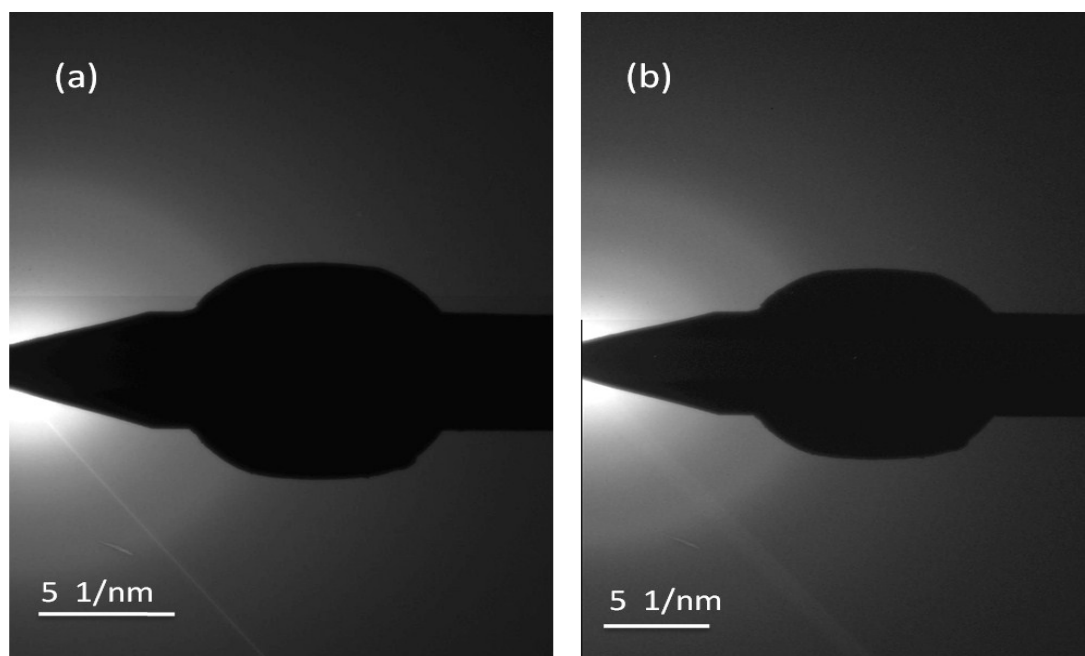

Figure S1- Diffraction pattern of (a) SBA/PS and (b) SBA/PS/PPA

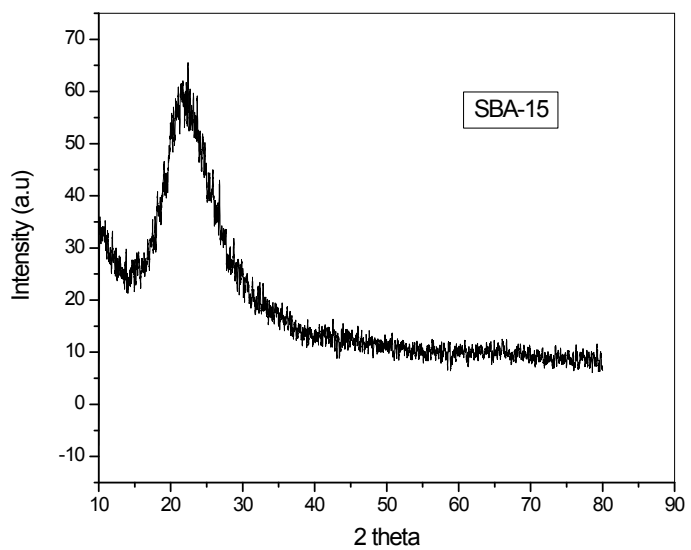

Figure S2 PXRD pattern of SBA-15

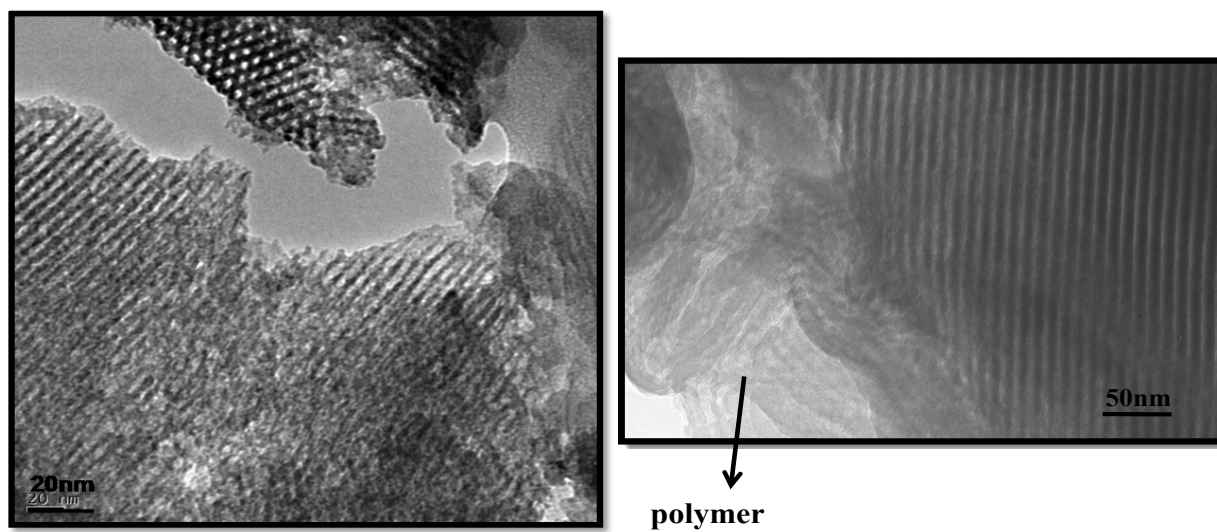

Figure S3 TEM images of (a) SBA-15 only without any polymer (b) SBA/PS
